# Supplementary material for: Global, regional, and national burden of chronic kidney diseasein youth and young adults aged 15–39 years :insights from the GBD 2021 study
Source: Research Square preprint supplement (doi:10.21203/rs.3.rs-6655666/v1), 2025-06-13

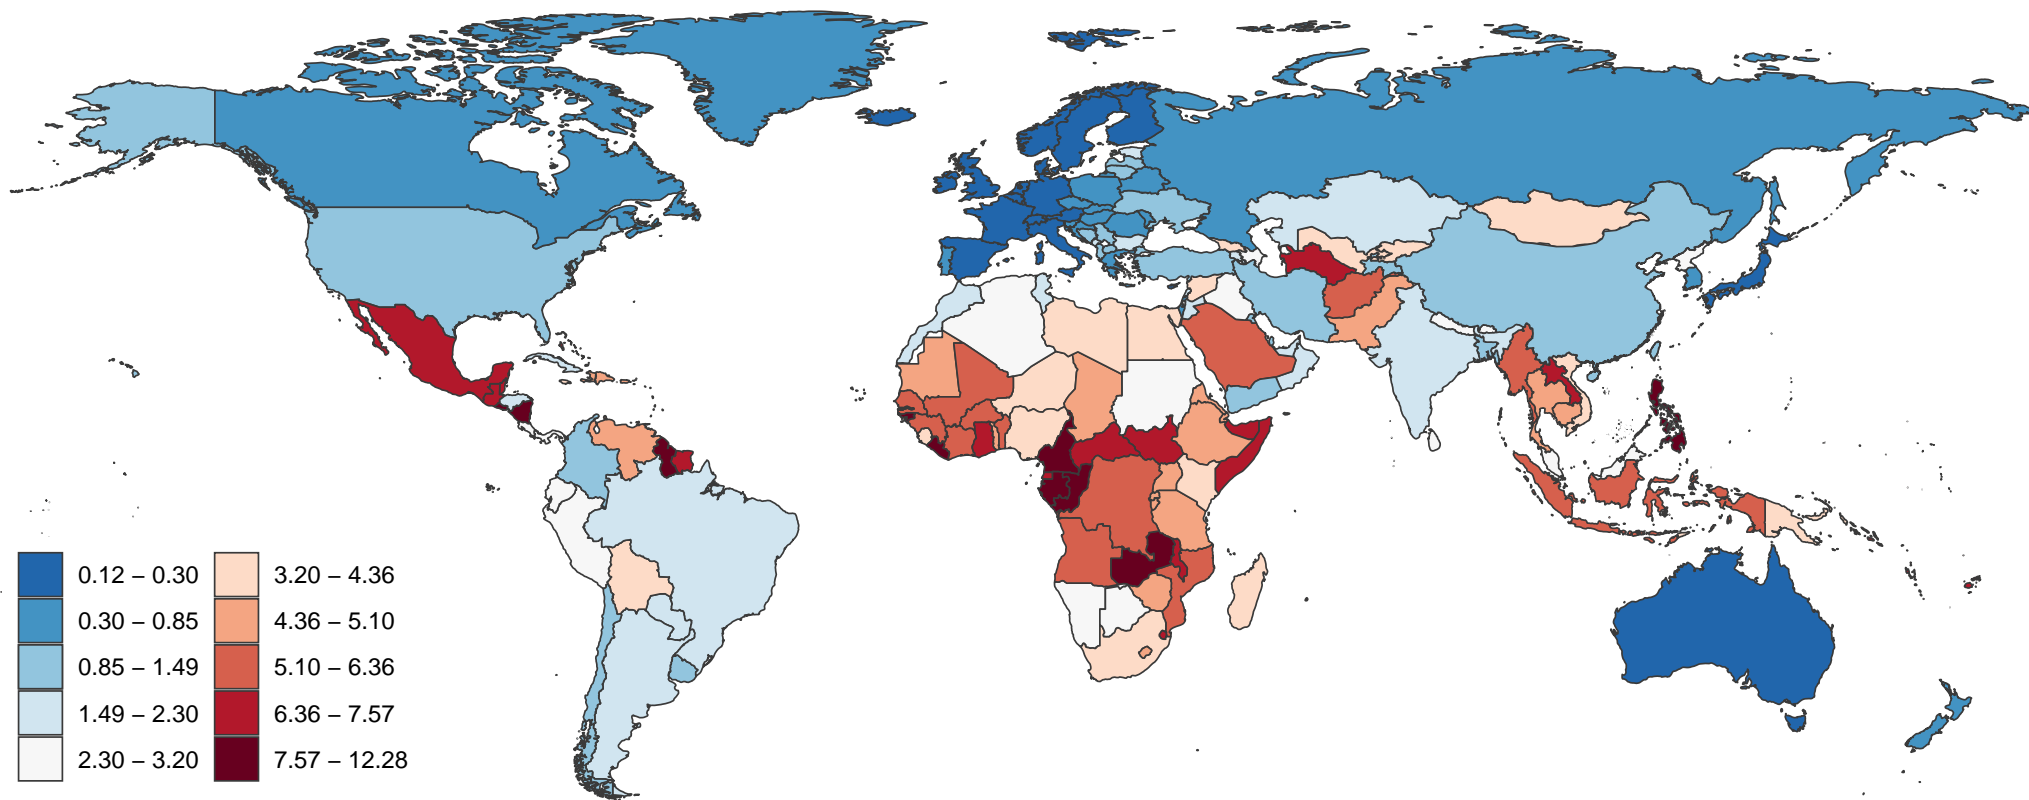

Caribbean and central America

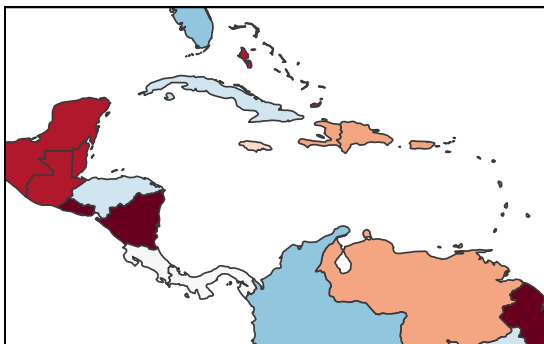

Persian Gulf

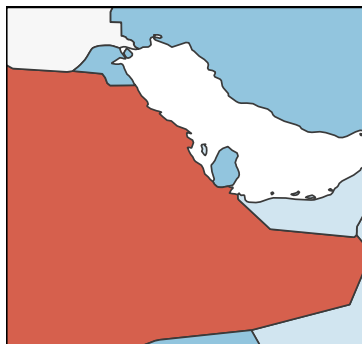

Balkan Peninsula

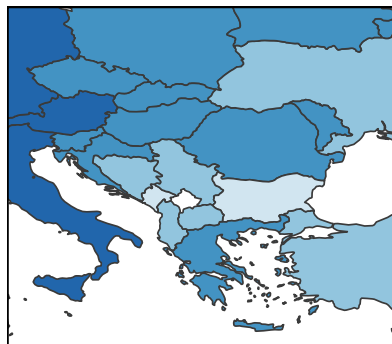

Sotheast Asia

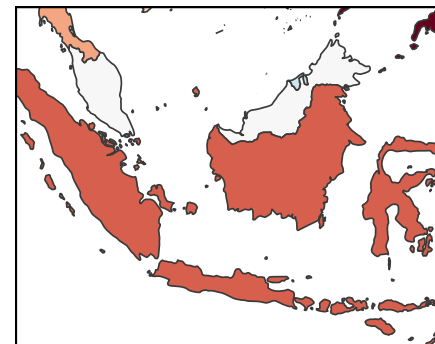

West Africa

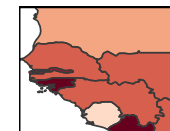

Eastern Mediterranean

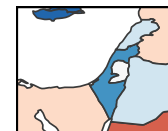

Northern Europe

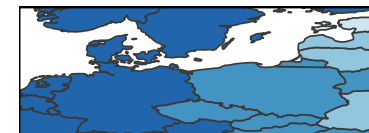

Supplement: Supplementary file 1 [file 3c23d4760ece1509c7b310c3.pdf]
