# Supplementary material for: Global, regional, and national burden of chronic kidney diseasein youth and young adults aged 15–39 years :insights from the GBD 2021 study
Source: Research Square preprint supplement (doi:10.21203/rs.3.rs-6655666/v1), 2025-06-13
Supplement: Supplementary file 1 [file 4e7a79da6eb2090f3d0f4e6f.docx]

**Table**  Age standardized DALYs rate (ASDR) of chronic kidney disease in 1990 and 2021, and estimated annual percentage change (EAPC) from 1990 to 2021 at the global and regional level.

|  | **1990** | | **2021** | | **1990-2021** |
| --- | --- | --- | --- | --- | --- |
| **DALYs cases,**  **000s (95% UI)** | **ASDRs**  **per 100 000**  **(95% UI)** | **DALYs cases,**  **000s (95% UI)** | **ASDRs**  **per 100 000**  **(95% UI)** | **EAPC, %,**  **(95% CI)** |
| Global | 4345519.08(3793032.09,5009100.55) | 203.27(177.54,234.47) | 6279611.01(5508541.54,7176242.60) | 208.84(183.20,238.59) | -0.02(-0.08,0.04) |
| Sex |  |  |  |  |  |
| Female | 2008751.41(1755293.69,2317511.04) | 190.34(166.30,219.65) | 2694756.38(2337664.58,3156951.64) | 181.51(157.47,212.54) | -0.30(-0.38,-0.22) |
| Male | 2336767.67(1964232.52,2735702.31) | 215.89(181.80,252.91) | 3584854.63(3088709.98,4161698.45) | 235.41(202.78,273.26) | 0.21(0.16,0.25) |
| SDI |  |  |  |  |  |
| High | 298710.48(248146.63,365479.08) | 83.19(69.16,101.74) | 371856.31(301294.85,456162.69) | 96.47(78.06,118.47) | 0.74(0.61,0.87) |
| High-middle | 689922.89(598511.24,803984.75) | 152.96(132.69,178.24) | 509427.16(432530.57,612933.10) | 106.95(90.85,128.49) | -1.47(-1.61,-1.34) |
| Middle | 1791666.00(1541043.21,2052123.33) | 249.65(215.01,286.10) | 2176958.90(1902632.59,2477483.75) | 227.54(198.89,258.76) | -0.41(-0.49,-0.34) |
| Low-middle | 1003672.34(865136.16,1181148.93) | 233.62(201.40,275.16) | 1934950.94(1678921.41,2236757.60) | 245.78(213.21,284.24) | 0.14(0.08,0.21) |
| Low | 557613.26(470421.75,651400.94) | 310.51(263.00,364.13) | 1280871.58(1074698.06,1552316.63) | 295.06(248.05,357.88) | -0.31(-0.38,-0.25) |
| Regions |  |  |  |  |  |
| Andean Latin America | 39121.74(33510.77,45850.78) | 264.37(226.51,310.04) | 58604.46(47659.83,71742.47) | 216.72(176.22,265.29) | -0.88(-1.21,-0.55) |
| Australasia | 3234.03(2488.36,4278.44) | 38.85(29.91,51.35) | 4833.60(3664.65,6498.11) | 42.85(32.46,57.58) | 0.34(0.24,0.45) |
| Caribbean | 32181.26(28088.31,37684.96) | 228.53(199.73,267.23) | 54176.01(43459.23,71695.61) | 295.41(236.90,391.19) | 1.26(1.10,1.41) |
| Central Asia | 58348.52(49301.26,69534.18) | 208.91(176.44,249.12) | 107706.83(92091.62,128010.66) | 280.33(239.50,333.12) | 0.37(-0.09,0.83) |
| Central Europe | 61777.41(54355.32,71687.91) | 127.76(112.22,148.53) | 27540.06(22062.15,35092.03) | 73.05(58.19,93.41) | -1.71(-1.83,-1.59) |
| Central Latin America | 175382.75(160810.59,194639.08) | 269.89(246.98,300.33) | 382174.89(336215.17,437797.08) | 377.88(332.41,432.92) | 1.48(1.31,1.65) |
| Central Sub-Saharan Africa | 82678.43(62252.94,106628.49) | 405.60(306.84,521.39) | 214017.37(156224.55,288430.57) | 405.06(296.94,545.15) | -0.04(-0.12,0.04) |
| East Asia | 1096900.71(925135.33,1287902.27) | 199.76(168.63,234.68) | 598778.86(482892.73,743435.21) | 113.37(91.40,140.39) | -2.28(-2.48,-2.08) |
| Eastern Europe | 117420.01(105971.38,133337.12) | 131.73(118.86,149.67) | 56662.01(47473.58,69246.29) | 76.67(63.71,94.11) | -2.69(-3.01,-2.36) |
| Eastern Sub-Saharan Africa | 268793.89(221803.16,315625.16) | 383.33(318.39,450.78) | 582947.25(482391.59,710607.14) | 337.03(279.60,410.32) | -0.63(-0.72,-0.55) |
| High-income Asia Pacific | 53076.81(45413.57,61603.82) | 78.46(67.10,91.08) | 23353.42(18497.51,29294.08) | 42.40(33.63,53.16) | -1.88(-2.01,-1.76) |
| High-income North America | 93784.26(73317.21,120674.12) | 77.69(60.75,99.95) | 149970.12(123189.43,185045.20) | 115.77(94.93,143.03) | 1.72(1.53,1.92) |
| North Africa and Middle East | 262303.24(215872.89,336182.31) | 207.41(170.87,265.56) | 545039.57(452359.37,652833.21) | 210.42(174.72,251.96) | 0.19(0.08,0.30) |
| Oceania | 6329.56(4019.20,8750.19) | 254.57(163.43,350.41) | 16703.85(12653.36,21549.65) | 304.39(231.43,392.22) | 0.43(0.32,0.55) |
| South Asia | 746246.18(627572.67,904151.34) | 183.15(153.95,221.82) | 1443018.25(1193666.02,1780744.77) | 185.53(153.44,228.98) | 0.04(-0.11,0.18) |
| Southeast Asia | 716102.14(571583.42,835346.83) | 376.68(302.54,438.93) | 1053968.96(847701.73,1234070.20) | 375.34(301.52,439.43) | -0.16(-0.26,-0.07) |
| Southern Latin America | 29576.51(26219.36,33255.05) | 157.97(139.96,177.64) | 30071.16(25829.08,35212.84) | 114.02(97.97,133.46) | -0.79(-0.89,-0.69) |
| Southern Sub-Saharan Africa | 56549.63(48044.76,68711.49) | 292.56(249.06,353.69) | 102184.62(86715.85,122259.17) | 295.31(250.51,353.55) | 0.05(-0.73,0.85) |
| Tropical Latin America | 126983.05(114929.82,142635.09) | 208.21(188.61,233.77) | 122378.72(107036.53,142825.51) | 132.60(115.92,154.80) | -1.61(-1.77,-1.45) |
| Western Europe | 85077.37(62076.13,115530.05) | 57.79(42.19,78.44) | 73380.17(50888.97,101232.23) | 53.05(36.72,73.19) | -0.23(-0.31,-0.16) |
| Western Sub-Saharan Africa | 233651.57(184372.05,295542.37) | 337.90(267.22,429.33) | 632100.85(482631.90,812220.27) | 344.95(264.24,444.25) | 0.02(-0.06,0.10) |

ASDR = age standardized deaths rate; EAPC = estimated annual percentage change; SDI = socio-demographic index; 95% UI = 95% uncertainty interval; 95% CI = 95% confidence interval.
