# Supplementary material for: Global, regional, and national burden of chronic kidney diseasein youth and young adults aged 15–39 years :insights from the GBD 2021 study
Source: Research Square preprint supplement (doi:10.21203/rs.3.rs-6655666/v1), 2025-06-13
Supplement: Supplementary file 2 [file 90fa1775c019944dcad50405.docx]

**Table**  Age standardized mortality rate (ASMR) of chronic kidney disease in 1990 and 2021, and estimated annual percentage change (EAPC) from 1990 to 2021 at the global and regional level.

|  | **1990** | | **2021** | | **1990-2021** |
| --- | --- | --- | --- | --- | --- |
| **Mortality cases**  **(95% UI)** | **ASMRs**  **per 100 000**  **(95% UI)** | **Mortality cases**  **(95% UI)** | **ASMRs**  **per 100 000**  **(95% UI)** | **EAPC, %,**  **(95% CI)** |
| Global | 56282.57(50229.41,62986.69) | 2.65(2.37,2.96) | 82472.72(74289.19,91047.59) | 2.74(2.46,3.02) | -0.03(-0.11,0.05) |
| Sex |  |  |  |  |  |
| Female | 25236.25(22533.91,28644.36) | 2.41(2.15,2.73) | 33867.26(30027.67,38162.85) | 2.28(2.02,2.57) | -0.39(-0.50,-0.28) |
| Male | 31046.33(25590.97,36161.90) | 2.88(2.38,3.36) | 48605.46(42292.44,54891.79) | 3.19(2.77,3.60) | 0.24(0.18,0.30) |
| SDI |  |  |  |  |  |
| High | 2861.61(2715.08,3045.34) | 0.80(0.75,0.85) | 3851.70(3212.78,4583.13) | 0.98(0.82,1.17) | 1.16(0.89,1.42) |
| High-middle | 8750.01(7900.21,9987.27) | 1.94(1.75,2.22) | 6052.46(5338.46,6985.89) | 1.25(1.11,1.45) | -1.89(-2.09,-1.69) |
| Middle | 23964.04(20445.75,26780.66) | 3.38(2.89,3.77) | 29205.07(26016.15,31798.41) | 3.04(2.70,3.31) | -0.49(-0.58,-0.39) |
| Low-middle | 12937.80(11157.09,15163.80) | 3.05(2.63,3.57) | 25466.01(22230.64,28999.02) | 3.25(2.84,3.70) | 0.16(0.09,0.24) |
| Low | 7717.21(6481.88,9096.75) | 4.35(3.68,5.15) | 17821.31(14785.66,21760.90) | 4.16(3.46,5.08) | -0.30(-0.37,-0.23) |
| Regions |  |  |  |  |  |
| Andean Latin America | 544.71(462.06,647.22) | 3.73(3.17,4.44) | 825.88(649.82,1032.34) | 3.06(2.41,3.82) | -0.94(-1.31,-0.56) |
| Australasia | 25.89(23.85,28.10) | 0.31(0.29,0.34) | 38.47(34.98,41.90) | 0.34(0.31,0.37) | 0.61(0.44,0.77) |
| Caribbean | 439.00(386.42,520.78) | 3.16(2.79,3.75) | 777.98(611.20,1076.35) | 4.24(3.33,5.86) | 1.45(1.27,1.63) |
| Central Asia | 618.92(567.20,678.54) | 2.22(2.04,2.44) | 1300.41(1125.94,1477.95) | 3.37(2.91,3.83) | 0.50(-0.12,1.13) |
| Central Europe | 754.90(723.89,789.25) | 1.54(1.48,1.61) | 267.04(231.43,316.05) | 0.69(0.60,0.82) | -2.57(-2.73,-2.41) |
| Central Latin America | 2335.81(2263.48,2426.01) | 3.63(3.52,3.77) | 5486.04(4860.95,6241.26) | 5.43(4.81,6.17) | 1.71(1.53,1.89) |
| Central Sub-Saharan Africa | 1166.35(860.58,1528.27) | 5.81(4.30,7.58) | 3067.38(2154.82,4244.50) | 5.88(4.14,8.14) | 0.02(-0.07,0.11) |
| East Asia | 14850.87(12555.98,17337.96) | 2.72(2.30,3.18) | 7839.72(6177.69,9683.58) | 1.47(1.16,1.81) | -2.58(-2.85,-2.31) |
| Eastern Europe | 1541.20(1505.32,1591.07) | 1.71(1.67,1.77) | 663.39(592.96,748.29) | 0.87(0.77,0.99) | -3.32(-3.74,-2.91) |
| Eastern Sub-Saharan Africa | 3938.27(3222.75,4649.10) | 5.73(4.72,6.78) | 8593.44(7056.39,10546.67) | 5.06(4.16,6.20) | -0.63(-0.72,-0.54) |
| High-income Asia Pacific | 602.05(513.62,674.23) | 0.89(0.76,1.00) | 165.77(152.05,192.81) | 0.30(0.27,0.35) | -3.60(-3.82,-3.37) |
| High-income North America | 730.06(709.90,750.68) | 0.60(0.58,0.62) | 1472.89(1312.34,1578.08) | 1.13(1.00,1.21) | 2.82(2.53,3.11) |
| North Africa and Middle East | 3337.03(2682.86,4490.91) | 2.69(2.16,3.60) | 7289.02(5979.01,8796.74) | 2.80(2.30,3.38) | 0.28(0.13,0.43) |
| Oceania | 83.68(46.94,121.62) | 3.41(1.94,4.94) | 228.50(167.06,301.48) | 4.19(3.07,5.52) | 0.51(0.37,0.65) |
| South Asia | 8690.97(7522.03,10529.49) | 2.16(1.87,2.61) | 16828.94(13706.73,20618.54) | 2.17(1.77,2.66) | -0.03(-0.20,0.13) |
| Southeast Asia | 9976.49(7704.98,11585.50) | 5.30(4.12,6.14) | 15030.87(11804.00,17571.53) | 5.34(4.19,6.24) | -0.11(-0.22,-0.01) |
| Southern Latin America | 384.11(351.67,421.05) | 2.06(1.88,2.26) | 353.20(317.32,387.88) | 1.34(1.20,1.47) | -1.20(-1.32,-1.08) |
| Southern Sub-Saharan Africa | 806.95(681.58,983.04) | 4.25(3.59,5.14) | 1492.93(1263.25,1813.62) | 4.31(3.64,5.23) | 0.10(-0.81,1.03) |
| Tropical Latin America | 1682.19(1607.26,1763.93) | 2.79(2.67,2.92) | 1511.65(1423.05,1588.64) | 1.63(1.53,1.71) | -1.95(-2.16,-1.74) |
| Western Europe | 500.81(482.80,521.50) | 0.34(0.33,0.35) | 345.56(325.94,380.84) | 0.25(0.23,0.27) | -0.85(-1.00,-0.71) |
| Western Sub-Saharan Africa | 3272.30(2531.41,4221.04) | 4.81(3.73,6.23) | 8893.64(6602.56,11748.98) | 4.93(3.67,6.53) | 0.04(-0.04,0.12) |

ASMR = age standardized mortality rate; EAPC = estimated annual percentage change; SDI = socio-demographic index; 95% UI = 95% uncertainty interval; 95% CI = 95% confidence interval.
