# Supplementary material for: Global, regional, and national burden of chronic kidney diseasein youth and young adults aged 15–39 years :insights from the GBD 2021 study
Source: Research Square preprint supplement (doi:10.21203/rs.3.rs-6655666/v1), 2025-06-13
Supplement: Supplementary file 3 [file fe28e1b741b6ae5fbc50bbd1.docx]

**Table**  Age standardized incidence rate (ASIR) of chronic kidney disease in 1990 and 2021, and estimated annual percentage change (EAPC) from 1990 to 2021 at the global and regional level.

|  | **1990** | | **2021** | | **1990-2021** |
| --- | --- | --- | --- | --- | --- |
| **Incident cases,**  **(95% UI)** | **ASIRs**  **per 100 000**  **(95% UI)** | **Incident cases,**  **(95% UI)** | **ASIRs**  **per 100 000**  **(95% UI)** | **EAPC, %,**  **(95% CI)** |
| Global | 591477.45(322135.84,917594.00) | 28.11(15.44,43.43) | 1072608.51(642724.39,1564455.98) | 35.48(21.22,51.82) | 0.80(0.74,0.85) |
| Sex |  |  |  |  |  |
| Female | 313403.18(170133.35,485240.67) | 30.18(16.55,46.53) | 549519.73(324844.70,805229.79) | 36.75(21.67,53.97) | 0.64(0.59,0.68) |
| Male | 278074.27(151251.89,432368.82) | 26.09(14.30,40.42) | 523088.78(316507.58,752856.42) | 34.21(20.68,49.29) | 0.97(0.90,1.03) |
| SDI |  |  |  |  |  |
| High | 66516.85(33123.48,112002.91) | 18.44(9.10,31.16) | 82473.85(45834.55,130133.89) | 21.09(11.50,33.66) | 0.47(0.42,0.51) |
| High-middle | 114571.94(60881.54,179263.58) | 25.48(13.57,39.83) | 147860.47(85491.70,220891.30) | 30.18(17.14,45.58) | 0.66(0.60,0.71) |
| Middle | 224104.39(121496.57,345244.90) | 31.82(17.50,48.65) | 398323.49(241866.46,570108.91) | 41.42(25.07,59.47) | 0.94(0.88,1.01) |
| Low-middle | 140914.91(78242.85,214924.16) | 33.59(18.94,50.82) | 312506.12(188214.05,453010.83) | 39.93(24.11,57.76) | 0.53(0.44,0.62) |
| Low | 44795.83(24312.96,69123.24) | 26.05(14.31,39.95) | 130450.16(76038.73,190125.31) | 30.99(18.15,44.97) | 0.54(0.44,0.63) |
| Regions |  |  |  |  |  |
| Andean Latin America | 3441.79(1684.00,5642.21) | 24.17(12.08,39.30) | 9635.15(5302.47,14766.73) | 35.98(19.88,55.04) | 1.42(1.37,1.47) |
| Australasia | 964.74(379.00,1750.22) | 11.57(4.50,21.06) | 1771.89(782.65,3085.24) | 15.69(6.77,27.57) | 1.03(0.94,1.12) |
| Caribbean | 5169.15(2806.24,7980.80) | 37.47(20.75,57.36) | 10167.62(6239.39,14616.35) | 55.50(34.04,79.81) | 1.42(1.33,1.51) |
| Central Asia | 14345.86(8367.95,21396.07) | 51.12(29.85,76.27) | 25336.60(15732.54,36369.55) | 68.21(42.76,97.32) | 1.00(0.86,1.14) |
| Central Europe | 11902.24(5944.75,19428.66) | 24.16(11.87,39.70) | 11888.24(6625.25,18199.44) | 30.47(16.60,47.09) | 0.70(0.62,0.78) |
| Central Latin America | 27459.90(15080.86,42365.51) | 44.08(24.69,67.52) | 70994.34(46579.94,99046.31) | 70.35(46.18,98.11) | 1.64(1.53,1.75) |
| Central Sub-Saharan Africa | 3558.60(1692.44,5798.17) | 18.17(8.71,29.45) | 12013.00(6264.71,18468.66) | 23.46(12.43,35.84) | 0.77(0.60,0.94) |
| East Asia | 122336.05(60776.58,197015.70) | 22.58(11.35,36.13) | 119680.32(63958.19,182749.15) | 22.09(11.49,34.31) | 0.14(0.06,0.23) |
| Eastern Europe | 34534.09(18972.66,53337.80) | 38.12(20.69,59.24) | 42776.18(25179.18,63116.65) | 55.87(32.07,83.59) | 1.24(1.18,1.29) |
| Eastern Sub-Saharan Africa | 11341.31(5520.63,18362.72) | 17.06(8.34,27.46) | 31615.29(17059.25,47598.33) | 19.15(10.42,28.75) | 0.28(0.11,0.45) |
| High-income Asia Pacific | 15057.21(7309.39,24814.75) | 22.06(10.65,36.42) | 10980.97(5508.62,17952.00) | 19.48(9.47,32.24) | -0.45(-0.55,-0.34) |
| High-income North America | 23195.61(11010.69,40270.23) | 19.36(9.04,33.82) | 21976.97(10533.46,37486.61) | 16.97(8.04,29.13) | -0.56(-0.74,-0.39) |
| North Africa and Middle East | 42570.39(23814.05,65652.14) | 35.83(20.54,54.60) | 142805.30(87833.07,209174.54) | 53.84(32.88,79.22) | 1.18(1.09,1.27) |
| Oceania | 1078.21(622.80,1605.53) | 42.71(24.83,63.51) | 2689.01(1648.03,3864.48) | 48.84(29.98,70.11) | 0.32(0.26,0.38) |
| South Asia | 141617.59(78849.55,214491.29) | 35.13(19.84,52.84) | 288037.51(169840.77,418590.25) | 37.00(21.86,53.69) | 0.18(0.07,0.29) |
| Southeast Asia | 64513.72(35248.69,98604.64) | 34.44(19.05,52.38) | 129571.50(79148.58,185308.75) | 46.22(28.23,66.13) | 0.90(0.84,0.96) |
| Southern Latin America | 2756.42(1203.89,4948.19) | 14.89(6.58,26.59) | 4562.12(2137.31,7403.50) | 17.15(7.97,27.92) | 0.60(0.54,0.66) |
| Southern Sub-Saharan Africa | 7934.38(4494.05,11869.06) | 39.98(23.04,59.38) | 15317.11(9398.19,21814.22) | 44.31(27.12,63.19) | 0.17(0.03,0.32) |
| Tropical Latin America | 20757.98(11403.29,31859.57) | 34.91(19.54,53.00) | 36874.54(21751.46,53582.12) | 39.04(22.73,57.16) | 0.20(0.12,0.28) |
| Western Europe | 16181.30(6392.64,29876.00) | 11.03(4.34,20.39) | 15599.30(6615.17,28119.12) | 11.13(4.61,20.26) | 0.02(-0.04,0.08) |
| Western Sub-Saharan Africa | 20760.93(11159.16,32093.72) | 30.53(16.56,47.02) | 68315.55(39402.92,100844.62) | 37.89(21.88,55.76) | 0.67(0.56,0.78) |

ASPR = age standardized prevalence rate; EAPC = estimated annual percentage change; SDI = socio-demographic index; 95% UI = 95% uncertainty interval; 95% CI = 95% confidence interval.
